# Efecto del cambio climático en la calidad del agua de la Cuenca del Júcar

## *Climate change effect on water quality in the Júcar River Basin*

Suárez-Almiñana, S.<sup>a1\*</sup>, Paredes-Arquiola, J.<sup>a2</sup>, Andreu, J.<sup>a3</sup>, Solera, A.<sup>a4</sup>

<sup>a</sup>Instituto universitario de Ingeniería del Agua y Medio Ambiente (IIAMA), Universitat Politècnica de València (UPV), Camino de Vera s/n, 46022, Valencia, España

E-mail: <sup>a1</sup>sasual@upv.es, <sup>a2</sup>jparedea@hma.upv.es, <sup>a3</sup>ximoand@upv.es, <sup>a4</sup>asolera@upv.es

\*Autor para correspondencia

Recibido: 19/11/2020

Aceptado: 22/03/2021

Publicado: 30/04/2021

**Citar como:** Suárez-Almiñana, S., Paredes-Arquiola, J., Andreu, J., Solera, A. 2021. Climate change effect on water quality in the Júcar River Basin. *Ingeniería del agua*, 25(2), 75-95. <https://doi.org/10.4995/ia.2021.14644>

## RESUMEN

En este estudio se analiza el efecto del cambio climático en la calidad del agua de la cuenca del Júcar a partir de estimaciones futuras de aportaciones hidrológicas y temperatura del agua ( $T_a$ ). Para ello, se utilizó un modelo de calidad de aguas a escala de cuenca con el que se estimó el estado ecológico de todas las masas de agua, basándose en las concentraciones de  $\text{DBO}_5$ , P,  $\text{NH}_4^+$  y  $\text{NO}_3^-$  para los horizontes futuros 2020, 2050 y 2080. De este análisis se obtuvo un incremento del número de masas con altos niveles de contaminación (80-100% incumplimientos) en los horizontes 2050 y 2080, localizadas sobre todo en la parte media y baja de la cuenca. Además, la degradación de la  $\text{DBO}_5$  y el  $\text{NH}_4^+$  es muy dependiente de la temperatura del agua, poniendo de manifiesto la importancia de considerar esta variable en el modelo.

**Palabras clave** | estado ecológico, tasa de cambio futura, temperatura del agua, RREA, incumplimientos.

## ABSTRACT

*This study analyses the effect of climate change on water quality in the Júcar River Basin from future estimations of hydrological inputs and water temperature ( $W_T$ ). For this purpose, a large-scale water quality model was used to estimate the ecological status of all the water bodies, based on the concentrations of  $\text{BDO}_5$ , P,  $\text{NH}_4^+$  and  $\text{NO}_3^-$  for the future horizons 2020, 2050 and 2080. In this study, a greater number of water bodies with higher pollution levels (80-100% failures) were obtained in the horizons 2050 and 2080, which are located in the middle and lower parts of the basin. In addition, the degradation of  $\text{BDO}_5$  and the  $\text{NH}_4^+$  is highly dependent on  $W_T$ , highlighting the importance of considering this variable in the model.*

**Key words** | ecological status, future change rate, water temperature, RREA, failures.

## INTRODUCCIÓN

La influencia del ser humano sobre los recursos del planeta ha generado diversos problemas a escala global, ya que el consumo de estos recursos naturales suele ir acompañado de sobreexplotación y contaminación, causando la degradación de los ecosistemas (Pellicer-Martínez y Martínez-Paz, 2016).

Uno de los mayores problemas asociados es la aceleración del cambio climático, derivado sobre todo del consumo excesivo de hidrocarburos (IPCC, 2014). Este fenómeno afecta a gran parte de los sistemas naturales y su equilibrio, como es el caso del ciclo del agua, relacionado con el ámbito de los recursos hídricos.

En la actualidad, algunas zonas del planeta ya se encuentran afectadas por la escasez de recursos hídricos y su contaminación, que se puede ver acrecentada por el efecto del cambio climático a pesar de contar con sistemas integrales y robustos de gestión y planificación hidrológica. En este sentido, si nos enmarcamos a nivel europeo, existen regulaciones al respecto, como la ampliamente conocida Directiva Marco del Agua (EP, 2000) que se incluye en la regulación de todos los países miembros con el fin de tomar medidas para proteger las aguas y garantizar así su sostenibilidad, tanto en términos cuantitativos como cualitativos.

Además, en las últimas décadas también se ha incluido la obligatoriedad de analizar el impacto del cambio climático sobre este tipo de recursos en varias normativas a escala europea y estatal. Ejemplo de ello es su análisis en los Planes Hidrológicos de las grandes cuencas españolas, derivado de otros informes publicados por organismos científicos, como el del CEDEX (2017) sobre el impacto del cambio climático en los recursos hídricos y sequías en las cuencas más importantes de España. En el citado estudio, se prevé una disminución de las aportaciones (i.e. caudales) generalizada, sobre todo en el sur y el este del país, y el aumento en intensidad y duración de eventos extremos como la sequía.

Este tipo de estudios se pueden desarrollar gracias a los servicios climáticos, que proporcionan series temporales e indicadores provenientes de proyecciones climáticas a nivel global, europeo o nacional, como los proporcionados por CORDEX (*Coordinated Regional Climate Downscaling Experiment*), el SMHI (*Swedish Meteorological and Hydrological Institute*) y AEMET (Agencia Estatal de Meteorología de España), respectivamente. Sin embargo, la incertidumbre asociada a estas proyecciones es muy elevada, sobre todo en la vertiente mediterránea (Suárez-Almiñana et al., 2017; Marcos-García y Pulido-Velázquez, 2017; Barranco et al., 2018; Suárez-Almiñana et al., 2020a), lo que puede implicar que los resultados de estos estudios sean tomados con cautela a la hora de incluirlos en la toma de decisiones (Lemos and Rood, 2010; Naustdalslid, 2011).

Por otra parte, la mayoría de estos estudios se centran casi exclusivamente en el análisis cuantitativo de los recursos, dejando de lado la parte cualitativa (Serpa et al., 2017; Jong-Suk et al., 2019; Rocha et al., 2020) a pesar de su relación directa y del amplio abanico de modelos que combinan su simulación a diferentes escalas, tanto temporales como espaciales (Arnold et al., 1998; Whitehead et al., 1998; Pérez-Martín, 2005). Por este motivo, el principal objetivo de este estudio es relacionar estos dos aspectos y estimar los posibles impactos del cambio climático en la calidad del agua para una mejor gestión integral de la cuenca, lo que conlleva una toma de decisiones anticipada guiada por una evaluación de impacto más holística. Esta toma de decisiones podría evitar los fallos en los suministros y las enormes pérdidas económicas e impactos sociales y ambientales procedentes del mal estado (tanto cuantitativo como cualitativo) de las masas de agua.

En este sentido, también es interesante cuantificar la influencia de la temperatura del agua ( $T_a$ ) en las concentraciones de los contaminantes en el medio natural, ya que algunos de ellos (p. ej. amonio) dependen de la acción de microorganismos para su degradación, cuyo metabolismo se acelera o ralentiza dependiendo de los valores de esta variable (Ahmad et al., 2021; Zlatanović et al., 2017).

Además de ser un factor limitante para la vida de algunas especies (Wang et al., 2020), la  $T_a$  tiene una gran influencia en las propiedades y procesos que ocurren en el agua, como la solubilidad de gases y sales, entre muchos otros. Ejemplo de ello es la concentración de oxígeno disuelto, que disminuye con el aumento de la  $T_a$ , condicionando la capacidad de autodepuración de las masas de agua y produciendo desajustes en el ecosistema (mortalidad de peces, malos olores, etc.) (Pellicer-Martínez y Martínez-Paz, 2016; Wang et al., 2020; Xu et al., 2012). Estos desajustes también pueden estar relacionados con ciertos contaminantes provenientes del ciclo del nitrógeno, lo que puede llevar a la proliferación excesiva de masa vegetal y causar problemas de eutrofización en masas y embalses (Xu et al., 2012).

El caso de estudio seleccionado para cumplir con estos objetivos fue la cuenca del Júcar (este de España), caracterizada por su gran variabilidad hidrológica y tener problemas de calidad del agua relacionados sobre todo con materia orgánica y nutrientes. Como consecuencia del cambio climático en esta zona, se prevé una reducción de los caudales circulantes y, por ello, una menor capacidad de dilución de los vertidos (Rocha et al., 2020; Serpa et al., 2017), afectando negativamente a la calidad del agua en el futuro. Por otro lado, también se prevé un aumento de la  $T_a$ , que debería favorecer las cinéticas de degradación de los contaminantes, incrementándose la capacidad de autodepuración de las masas de agua. El efecto global sobre la calidad del agua de la reducción del recurso hídrico y el aumento de la  $T_a$  variará en función de la tipología de masa de agua, pero se espera que el efecto combinado de estas variables se pueda predecir con antelación y así prevenir los efectos nocivos del cambio climático en cuanto al empeoramiento del estado ecológico de las masas de agua.

## MATERIAL Y MÉTODOS

En esta sección, primero se presenta el caso de estudio y el estado actual de la calidad de sus masas de agua. Seguidamente, se introduce una metodología general para estimar la calidad del agua futura y su adaptación a la cuenca del Júcar, especificando los datos de entrada y las características del modelo de calidad del agua utilizado.

### Caso de estudio

La cuenca del Júcar se encuentra en la parte este de España y es el sistema de explotación más importante de la Demarcación Hidrográfica del Júcar (DHJ) en cuanto a superficie (22359 km<sup>2</sup>) y recursos hídricos generados (media de 1798.3 hm<sup>3</sup>/año en la serie histórica 1940-2012, media de 1605.4 hm<sup>3</sup>/año en la serie histórica 1980-2012) (CHJ, 2015). El río principal de este sistema es el Júcar (512 km), que desemboca en el mar Mediterráneo y tiene como principales afluentes a los ríos Cabriel, Magro y Albaida (Figura 1).

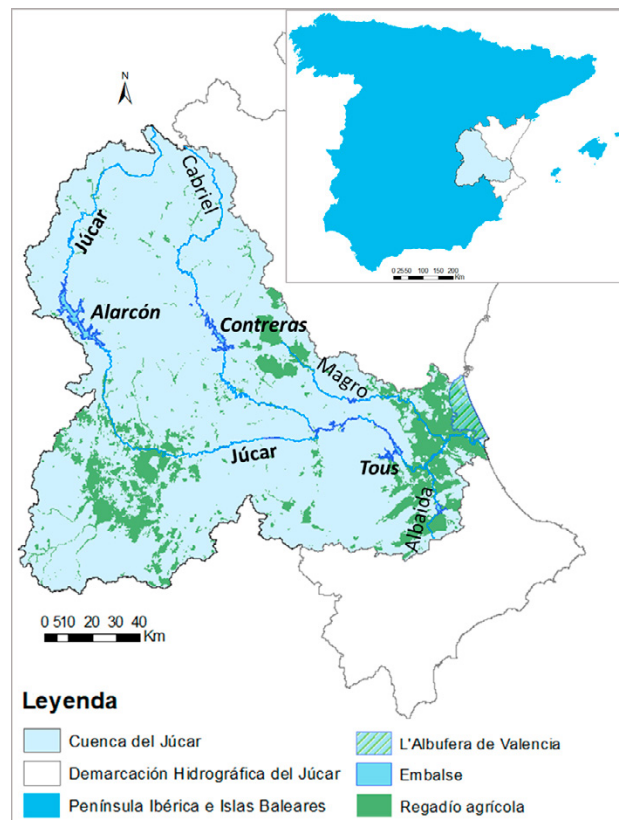

**Figura 1** | Localización de la cuenca del Júcar en España y la DHJ con algunas de sus características principales.

Además, una de las características principales de esta cuenca es su gran variabilidad hidrológica, propia del clima mediterráneo, con precipitaciones (P) medias de 475.2 mm/año, temperatura (T) media de 14.2 °C, y evapotranspiración potencial (ETP) media de 926.6 mm/año (CHJ, 2015).

Este es un sistema complejo, no solo por la gran variabilidad espacial y temporal en la distribución de las aportaciones, sino también por estar sujeto a una gran presión antrópica. Como se puede apreciar en la Figura 2, esta presión se debe principalmente a la actividad agrícola, localizada tanto en la zona media como en la zona costera de la cuenca, donde también se encuentra l'Albufera de Valencia, un humedal de 21120 ha compuesto por un lago y una gran extensión de arrozales.

En su regulación juegan una labor fundamental los embalses de Alarcón, Contreras y Tous, que suman una capacidad de 1796 hm<sup>3</sup> y combinan su uso y abastecimiento de agua con recursos subterráneos procedentes del acuífero de La Mancha Oriental (parte media de la cuenca) y de La Plana de Valencia (zona costera).

Por lo tanto, se trata de un sistema altamente regulado, tanto para hacer frente a las grandes demandas del sistema (80% uso agrícola y 20% otros usos, incluyendo el urbano) como a los fenómenos extremos, entre los que se pueden mencionar las sequías (con rachas plurianuales) y las inundaciones, relacionadas sobre todo con el fenómeno de la DANA (Depresión Atmosférica aislada en Niveles Altos) durante el periodo otoñal.

Todas estas presiones no solo afectan a los recursos de la cuenca de manera cuantitativa, sino también cualitativamente, lo que puede suponer fallos en los suministros o elevados costes de tratamiento de aguas, entre otros problemas socio-económicos y ambientales, ya considerados en el Plan Hidrológico de la Demarcación Hidrográfica del Júcar (PHDHJ) (CHJ, 2015), desarrollado por la Confederación Hidrográfica del Júcar (CHJ).

Por todo esto, en este artículo se decidió relacionar los impactos en las aportaciones derivados del cambio climático con los de la calidad del agua y así tener una visión global de la cuenca para el futuro. Para ello, primero observaremos el estado actual de las masas de agua en la siguiente sección.

### Estado actual de la calidad de las masas de agua

La Figura 2 muestra las 140 masas de agua de esta cuenca, sus numeraciones y la subcuenca a la que pertenecen.

En estas masas, la CHJ realiza mediciones periódicas (mensuales o trimestrales) para evaluar su estado, teniendo en cuenta la concentración de contaminantes relacionados con aportes de materia orgánica y nutrientes (entre otros), cuya degradación puede ser de forma química o biológica. Algunos de estos contaminantes son: la Demanda Biológica de Oxígeno al quinto día (DBO<sub>5</sub>), el fósforo (P), el amonio (NH<sub>4</sub><sup>+</sup>) y los nitratos (NO<sub>3</sub><sup>-</sup>).

En la Figura 3 se informa sobre qué masas de agua se encuentran impactadas por cada contaminante, las no impactadas y las no evaluadas por la CHJ. Los umbrales de concentración a partir de los cuales se considera una masa impactada se establecen en el Real Decreto 815/2015 (BOE, 2015) y en el PHDHJ (CHJ, 2015). Estos son: DBO<sub>5</sub>=6 mg/l, P=0.4 mg/l, NH<sub>4</sub><sup>+</sup>=0.6 mg/l y NO<sub>3</sub><sup>-</sup>=25 mg/l. En nuestro estudio para evaluar el impacto sobre las masas de agua se utiliza el porcentaje de meses en que las concentraciones son superiores a estos límites. Estos meses se denominan incumplimientos.

De las 140 masas, 39 de ellas no están evaluadas, ya sea porque no se consideró necesario, o por inaccesibilidad, falta de fondos u otras razones. De las 101 masas restantes, 4 de ellas se encuentran impactadas debido a concentraciones elevadas de DBO<sub>5</sub>, 8 de ellas en el caso del P, 5 en el caso del NH<sub>4</sub><sup>+</sup> y 12 en el de los NO<sub>3</sub><sup>-</sup>. En todos los casos, las subcuencas de Contreras y Tous no se ven afectadas, sin embargo, Molinar parece ser la subcuenca más afectada por todos los contaminantes, y Sueca en el caso de los NO<sub>3</sub><sup>-</sup>.

En términos generales, las masas de agua afectadas por P también lo están por NH<sub>4</sub><sup>+</sup>, y algunas de ellas por la DBO<sub>5</sub>. Sin embargo, el caso de los NO<sub>3</sub><sup>-</sup> difiere de los anteriores.

Debido a la gran cantidad de masas no evaluadas y el elevado coste que esto supondría, se hace necesario un método que permita disponer de una estimación de su situación. Por ello se propone el uso de un modelo de calidad del agua a gran escala que permita evaluar el nivel de contaminación de las masas de agua y su situación en escenarios de cambio climático.

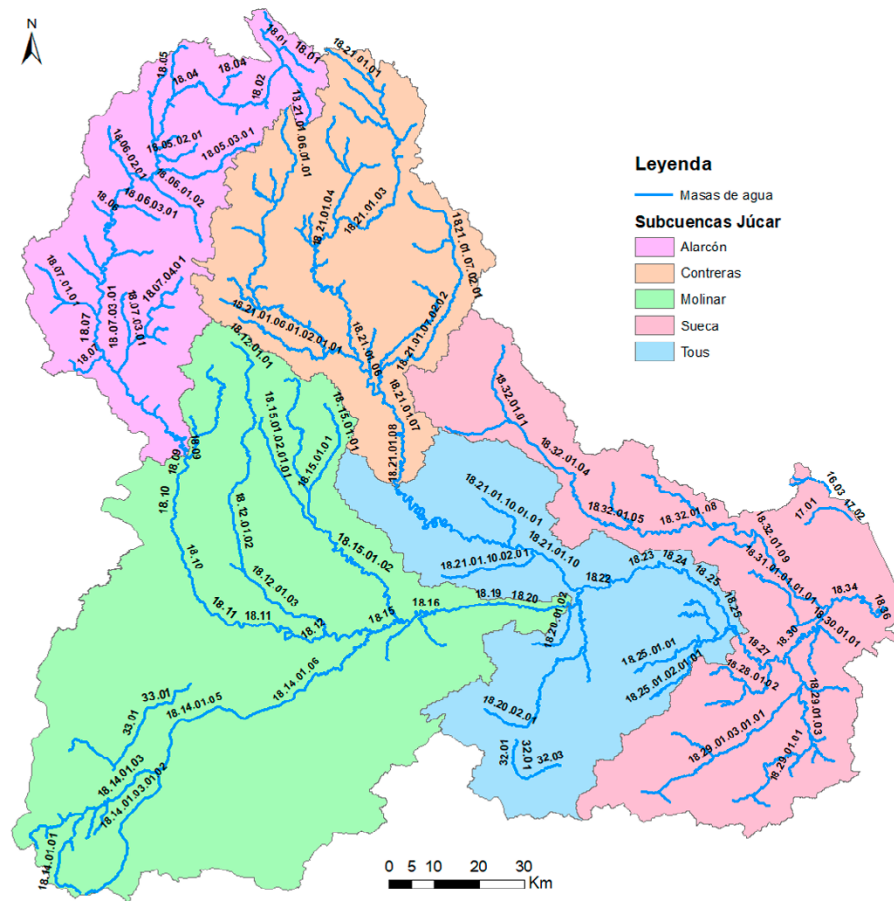

Figura 2 | Masas de agua de la cuenca del Júcar y la subcuenca a la que pertenecen (CHJ, 2015).

## METODOLOGÍA GENERAL

El primer paso de esta metodología (Figura 4) es la recopilación de los datos de entrada al modelo de calidad del agua. Aparte de las características físicas, las cargas de los contaminantes y las aportaciones de cada masa de agua, existe la opción de incluir otros datos opcionales para realizar la simulación. Estos datos están relacionados con los caudales ecológicos, las demandas de agua, los caudales observados de cada masa de agua (para corregir los caudales de entrada) y la  $T_a$ , cuya integración en el modelo depende sobre todo de la disponibilidad de datos. En este caso sí se ha considerado esta última variable, ya que, aparte de disponer de la  $T_a$  histórica, se hace imprescindible en este proceso por su influencia en la degradación de algunos contaminantes.

Para estimar el efecto del cambio climático en la calidad del agua, también se necesitan estimaciones futuras, tanto de aportaciones como de  $T_a$ , en este caso. Estas estimaciones se obtienen mediante la aplicación de tasas medias de cambio futuras a los datos de  $T_a$  y aportaciones históricas de cada masa de agua. Estas tasas de cambio se pueden obtener gracias a los servicios climáticos por medio de las proyecciones climáticas o derivadas de ciertos estudios relevantes a escala nacional o de cuenca. Normalmente, se consideran tres horizontes futuros compuestos de periodos de 30 años (como mínimo) hasta finales de siglo, correspondiendo con un periodo futuro cercano, uno medio y uno lejano (Barranco et al., 2018).

Una vez aplicadas las tasas de cambio, se obtiene la  $T_a$  y aportaciones futuras para cada horizonte, que se introducen junto con los otros datos (características físicas y cargas contaminantes actuales) en el modelo de calidad del agua, ya preparado y calibrado para ello. En este trabajo, se ha utilizado un modelo a gran escala llamado RREA (Respuesta Rápida del Estado Ambiental) (Paredes-Arquiola, 2014), cuyas características principales se detallan en la siguiente sección.

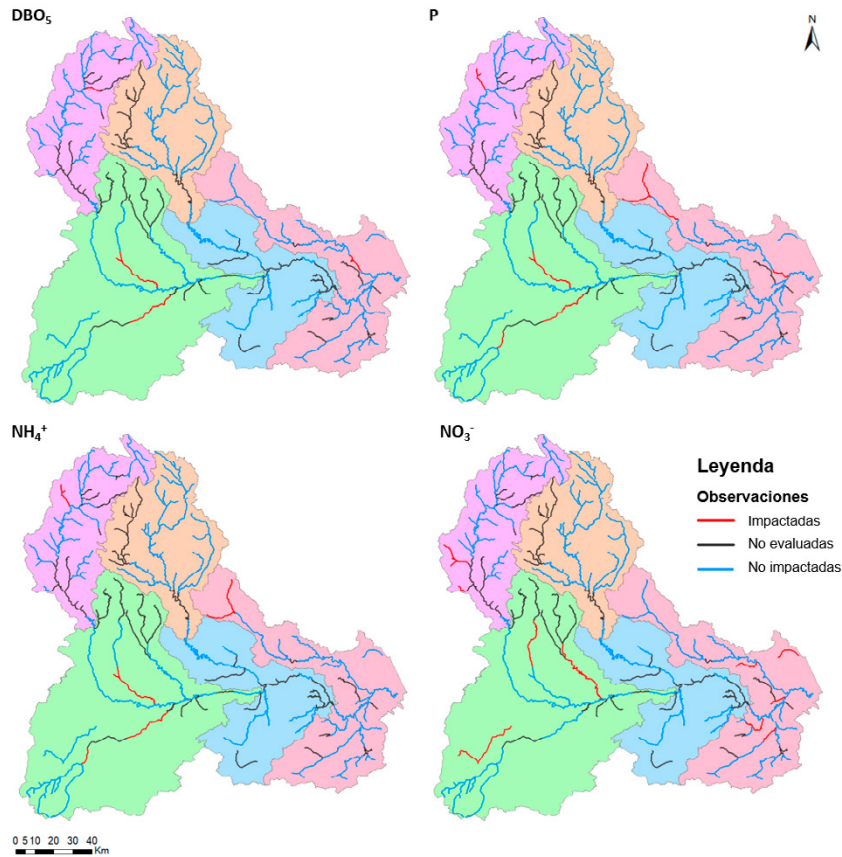

**Figura 3** | Masas de agua impactadas, no evaluadas y no impactadas basadas en las observaciones de la (CHJ, 2015) en la cuenca del Júcar para la DBO<sub>5</sub>, el P, el NH<sub>4</sub><sup>+</sup> y los NO<sub>3</sub><sup>-</sup>.

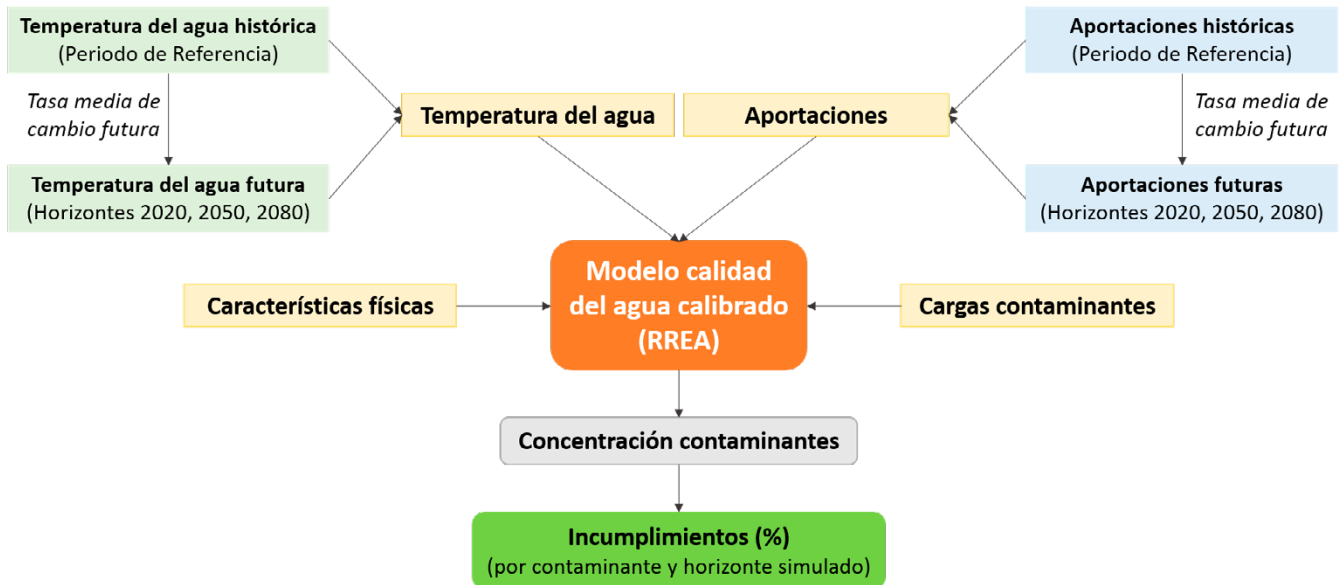

**Figura 4** | Metodología de modelado de la calidad del agua teniendo en cuenta la Ta y aportaciones futuras para la obtención del estado ecológico de las masas de agua por medio de porcentajes de incumplimiento para cada contaminante y horizonte simulado.

Como resultado de la simulación de este modelo, se obtiene la concentración de los contaminantes que ponen en peligro el buen estado de las masas de agua y sus correspondientes incumplimientos (%) por periodo u horizonte.

Así pues, y gracias a la posibilidad de modificar dos de las variables de entrada por sus estimaciones futuras, es posible realizar cuatro simulaciones diferentes para identificar los posibles problemas de calidad del agua a los que habría que hacer frente en el futuro. Primero se simula el periodo de referencia utilizando los datos históricos de todas las variables y seguidamente se procede a las tres simulaciones restantes: i) integrando la  $T_a$  futura, ii) integrando las aportaciones futuras e iii) integrando tanto la  $T_a$  como las aportaciones futuras. De esta forma, al comparar los incumplimientos de las tres simulaciones con las del periodo de referencia es posible evaluar el efecto de ambas variables (por separado y de forma combinada) sobre la calidad del agua, por contaminante y horizonte futuro.

### Modelo RREA

Para desarrollar el modelo de calidad del agua se utilizó la herramienta RREA, que estima las concentraciones de contaminantes en las masas de agua superficiales teniendo en cuenta la carga de contaminantes introducida en cada masa de agua, la contaminación procedente de aguas arriba y la degradación que se produce en la propia masa, utilizando como base la siguiente ecuación:

$$M_{e,i} = M_{gen,i} + \sum_{j=1}^n M_{s,j}(j \rightarrow i) \quad (1)$$

Donde,  $M_{e,i}$  es la masa de contaminante que entra en la masa de agua  $i$ ;  $M_{gen,i}$  es la masa de contaminante generada en la propia cuenca de la masa  $i$ , y  $M_{s,j}(j \rightarrow i)$  es la masa de contaminante de salida de todas las masas de agua  $j$  que vierten a la masa  $i$ .

A continuación, se simula la degradación de los contaminantes según una ecuación cinética de primer orden:

$$M_{s,i} = M_{e,i} \cdot e^{-KL} \quad (2)$$

Donde  $M_{s,i}$  es la masa de contaminante que sale de la masa de agua  $i$ ;  $K$  es la constante de degradación del contaminante en la masa  $i$ ;  $L$  es la longitud de la masa de agua.

Y se calcula la concentración de contaminante ( $C_i$ ) para el caudal de salida ( $Q_{s,i}$ ):

$$C_i = M_{s,i} / Q_{s,i} \quad (3)$$

Por lo tanto, los resultados principales que proporciona el modelo para cada masa de agua son: caudales ( $\text{hm}^3/\text{mes}$ ), concentración de contaminantes a la salida ( $\text{mg/l}$ ) y porcentajes de fallos por superación de los umbrales de concentración de los contaminantes a la salida (%) en cada masa de agua, los incumplimientos. Se puede encontrar más información sobre este modelo y su formulación en: [https://aquatool.webs.upv.es/files/manuales/rrea/ManualT%C3%A9cnicoModeloRREA\\_V3.pdf](https://aquatool.webs.upv.es/files/manuales/rrea/ManualT%C3%A9cnicoModeloRREA_V3.pdf).

Respecto a las constantes de degradación por masa de agua y contaminante ( $\text{km}^{-1}$  en ríos y  $\text{d}^{-1}$  en embalses), sus valores se fijan en el proceso de calibración, que se lleva a cabo en un proceso iterativo de prueba y error a partir de constantes bajas que se incrementan en aquellas masas de agua con altas concentraciones. Estas constantes se mantienen dentro de rangos aconsejables en la bibliografía, como los sugeridos por Bowie et al. (1985) y Flynn et al. (2015), pero dependen de otros factores relacionados con las condiciones ambientales, sean o no modificadas por la acción antrópica (Ferrer y Seco, 2008), como la  $T_a$ , considerada como la más importante en el desarrollo del fenómeno hídrico (Gutiérrez y de Jalón, 1999).

La influencia de esta variable se puede observar en la siguiente ecuación (Bowie et al., 1985; Ferrer y Seco, 2008):

$$K_T = K_{20} \cdot \theta^{(T_a - 20)} \quad (4)$$

Dónde:  $K_T$  y  $K_{20}$  son las constantes cinéticas de degradación a  $T$  y  $20^\circ\text{C}$ , respectivamente;  $\vartheta$  es el coeficiente de corrección de la temperatura.

Tanto el desarrollo inicial del modelo como su calibración fueron realizados de forma conjunta entre investigadores de la UPV y miembros de la administración de la CHJ como parte de los trabajos de Planificación Hidrológica para el ciclo 2021-27, no formando parte del ámbito de este estudio.

### Datos de entrada del modelo RREA

Los datos de entrada al modelo fueron proporcionados principalmente por la CHJ, como las masas de agua identificadas por código, su longitud, la masa de agua a la que descargan y el orden de flujo, la carga de contaminantes producida por los vertidos puntuales (kg/mes) y las series de aportaciones históricas. Todos ellos se pueden encontrar en el PHDHJ y en sus anejos de presiones e impactos.

Los contaminantes considerados en este estudio son la  $\text{DBO}_5$ , el P, el  $\text{NH}_4^+$  y los  $\text{NO}_3^-$ , basándonos en sus porcentajes de incumplimientos mensuales como principales resultados, cuyos umbrales de concentración se encuentran en el apartado “Estado actual de la calidad de las masas de agua”. Este modelo considera las relaciones entre los contaminantes estudiados y los procesos implicados, como los del balance del nitrógeno, por lo que el amonio que se nitrifica pasa a ser nitrato.

En cuanto a las aportaciones históricas, estas proceden del modelo PATRICAL (“Precipitación Aportación en Tramos de Red Integrado con CALidad del agua”; Pérez-Martín, 2005) en régimen natural. Este modelo de precipitación-escorrentía es un modelo quasi-distribuido (1 km×1 km) que funciona a grandes escalas espaciales y temporales (50-100 años) considerando la calidad del agua. Además, funciona a escala mensual y utiliza la formulación de Témez (1977) en cada celda, basada en mapas de P y ETP calculados mediante la interpolación de los valores de P y T de las estaciones meteorológicas (Pérez-Martín, 2005).

Para obtener las aportaciones futuras, en este caso se utilizaron las tasas medias de cambio de aportaciones obtenidas por Suárez-Almiñana *et al.*, (2020b), procedentes del desarrollo de una metodología de integración de proyecciones climáticas para la planificación hidrológica. En el citado estudio, se trabajó con la media del ensamblado compuesto por 9 Modelos Climáticos Regionales pertenecientes a las Sendas Representativas de Concentración (SRC) 4.5 y 8.5, ya que según lo acordado en la cumbre de cambio climático de París de 2015, la SRC más probable es un escenario intermedio entre estos dos, la SRC 6.0 (Barranco *et al.*, 2018; Suárez-Almiñana *et al.*, 2020a; 2020b). Por lo tanto, estas tasas medias proceden de la corrección del sesgo de las aportaciones futuras (procedentes de un modelo hidrológico) y su comparación con las del periodo histórico (1980-2000), extrayendo así las tasas medias de cambio para cada horizonte. El periodo histórico utilizado se puede considerar equivalente en recursos hídricos al de la serie “corta” 1980-2012 (Suárez-Almiñana *et al.*, 2020a).

Así pues, para evaluar el efecto del cambio climático en la calidad de las masas de agua, estas tasas medias de cambio por subcuenca, mes (año medio) y horizonte futuro (2020, 2050 y 2080) se aplicaron a cada una de las aportaciones de cada masa de agua en el periodo histórico 1980-2010, ya que según la Organización Meteorológica Mundial, para que un estudio sea estadísticamente representativo cada horizonte tiene que tener como mínimo 30 años (Trewin, 2007; Barranco *et al.*, 2018).

En esta ocasión, también consideramos la  $T_a$  en la simulación debido a la disponibilidad de datos. La  $T_a$  histórica fue proporcionada por la CHJ y la futura se encuentra disponible en el portal del proyecto SWICCA (*Service for Water Indicators in Climate Change Adaptation*, [www.swicca.eu](http://www.swicca.eu)), un proyecto Copernicus liderado por el SMHI que pone a disposición de los usuarios variables climáticas, hidrológicas, socioeconómicas, de calidad y cantidad del agua, indicadores, mapas, etc. provenientes de proyecciones climáticas relacionadas con los recursos hídricos a nivel europeo. Estos datos también se presentan en tasas de cambio por horizonte futuro (diferenciando entre la media del ensamblado o SRC) y comparten origen con las proyecciones climáticas utilizadas para la extracción de las tasas de cambio aplicadas a las aportaciones en este estudio (Suárez-Almiñana *et al.*, 2020b).

Como resultado de la aplicación de las tasas medias de cambio de aportaciones mensuales por masa de agua y horizonte (procedentes de Suárez-Almiñana *et al.*, 2020b), se obtuvieron unos cambios medios en toda la cuenca del 6% en el horizonte 2020, -2% en el 2050 y -12% en el 2080.



Por otro lado, el promedio anual del ensamblado de la Ta resultante para cada horizonte y subcuenca se muestra en la Tabla 1, donde se puede observar cómo la Ta aumenta en las diferentes subcuencas en función de los horizontes futuros. El promedio anual para toda la cuenca en el periodo de referencia es de 14.8 °C, para el horizonte 2020 es de 15.8 °C, y para 2050 y 2080 son de 16.4 °C y 17.2 °C, respectivamente. Por lo tanto, con respecto al periodo de referencia, la Ta aumentaría en 0.9 °C en el futuro cercano, 1.6 °C en el futuro medio y 2.4 °C en el futuro lejano.

**Tabla 1** | Temperatura del agua media (°C) para el periodo de referencia (PR) y cada horizonte futuro (2020, 2050, 2080), por subcuenca y para toda la cuenca del Júcar.

|      | Alarcón | Contreras | Molinar | Tous | Sueca | Cuenca del Júcar |
|------|---------|-----------|---------|------|-------|------------------|
| PR   | 13.2    | 12.8      | 15.1    | 16   | 17.2  | 14.8             |
| 2020 | 14.1    | 13.6      | 16.2    | 16.8 | 18.1  | 15.8             |
| 2050 | 14.7    | 14.3      | 17.1    | 17.4 | 18.7  | 16.4             |
| 2080 | 15.4    | 15        | 18.1    | 18.1 | 19.5  | 17.2             |

Seguidamente, las aportaciones y la Ta del periodo de referencia y las obtenidas para los horizontes futuros fueron introducidas en el modelo RREA para simular la calidad del agua en esta cuenca. Los resultados obtenidos en cada aplicación se detallan en la siguiente sección.

## RESULTADOS Y DISCUSIÓN

En esta sección se presentan los resultados procedentes de las cuatro simulaciones nombradas en “Metodología general” y su discusión. Primero se introducen los del periodo de referencia y después los de cambio climático, aportando mapas y figuras sobre los incumplimientos, el número de masas afectadas y el grado de afectación por contaminante, horizonte y simulación.

### Simulación del periodo de referencia

En la Figura 5 se pueden observar los incumplimientos de cada contaminante en el periodo de referencia. Las masas de agua 18.15.01.02, 18.14.01.06 y 18.12.01.02 de la subcuenca de Molinar son las más afectadas en el caso de la DBO<sub>5</sub>. Las dos primeras se encuentran en el rango de incumplimientos entre el 80-100%, mientras que la tercera está entre el 60-80%. Estos niveles de afectación se podrían deber a los numerosos vertidos de naturaleza urbana (saneamiento población) que hay en estas masas, además de algunos vertidos industriales relacionados con la industria vinícola y el almacenamiento de gasóleo con lavado de vehículos (Figura 1, “Material suplementario”).

Por otra parte, las subcuencas de Contreras y Tous no se ven especialmente afectadas (0-20%) y los incumplimientos son menores en las subcuencas de Alarcón y Sueca, donde solo una masa de cada una de ellas (la 18.07.04.03 y la 18.29.01.02, respectivamente) se encuentra en el rango 40-60%.

Las masas con incumplimientos más elevados (80-100%) para el P se presentan en las mismas masas de Molinar. Por el contrario, no se observan afecciones relevantes en las otras subcuencas, únicamente las masas 18.07.03.01 y 18.07.04.03 (Alarcón) presentan entre el 20-40% de incumplimientos.

También en el caso del NH<sub>4</sub><sup>+</sup> las masas de Molinar son las más afectadas al encontrarse en los intervalos 60-80% y 80-100%. En este caso también se observan algunas masas entre el 40-60% de incumplimientos en Alarcón (18.07.03.01, 18.07.04.03) y Sueca (18.32.01.03, 18.29.01.02), pero las masas más afectadas de Sueca son las 18.32.01.02 y 18.29.01.02, en el rango 60-80%.

Sin embargo, el caso de los NO<sub>3</sub><sup>-</sup> difiere de los anteriores por presentar afecciones en todas las subcuencas, en mayor o menor medida. En este caso, la subcuenca de Sueca es la más afectada, con la mayoría de las masas entre los intervalos 60-80% y 80-100%. Además, la mayoría de la subcuenca de Contreras se encuentra en el rango 20%-40% y en Alarcón destaca la masa

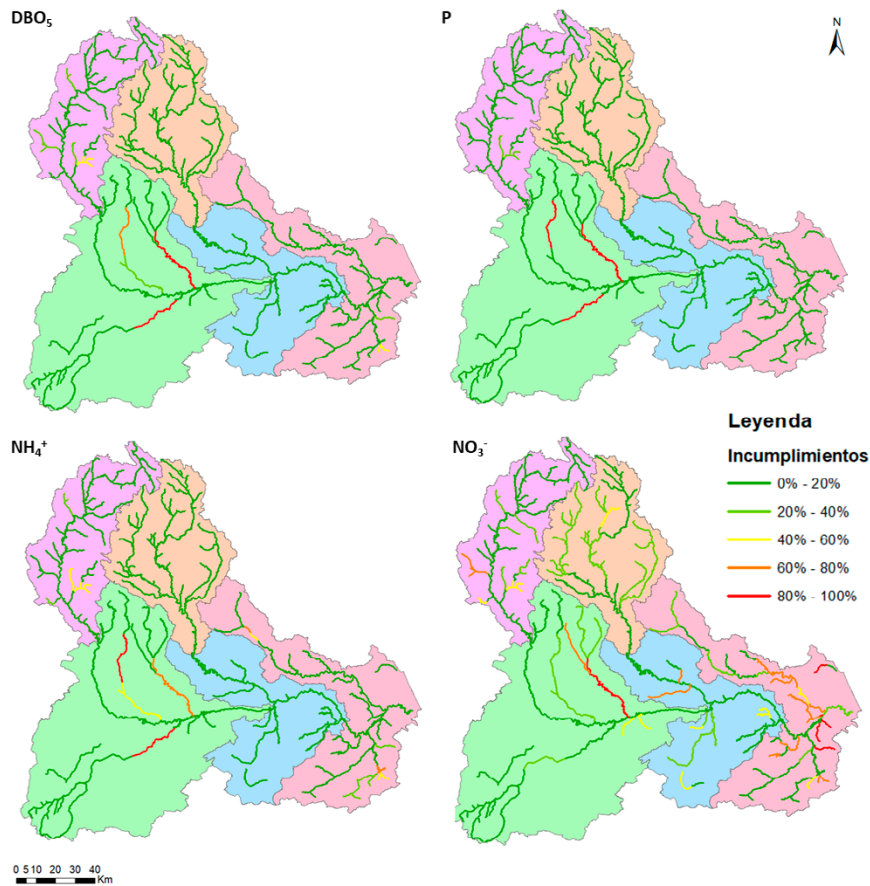

**Figura 5** | Masas afectadas por contaminante (DBO<sub>5</sub>, P, NH<sub>4</sub><sup>+</sup> y NO<sub>3</sub><sup>-</sup>) en el periodo de referencia (1980-2010) teniendo en cuenta la Ta histórica, donde las afecciones se estiman en porcentaje de incumplimientos de los contaminantes.

de agua 18.07.01.01 en el rango 60%-80%, (coincidiendo con la Figura 3 en afectación). En el mismo rango (60%-80%) se encuentran las masas 18.21.01.10.02.01 y 18.21.01.10 de la subcuenca de Tous, que en la Figura 3 aparecen como no evaluadas. Por otra parte, en Molinar destaca la masa 18.15.01.02 dentro del rango de incumplimientos más elevado.

La afección más amplia de este contaminante podría deberse a la influencia de la agricultura, ya que las zonas donde se desarrolla esta actividad (Figura 1) coinciden con las masas más contaminadas. El ejemplo más claro de esta influencia se encuentra en la parte baja de la cuenca donde se sitúa l'Albufera de Valencia y la gran extensión de cultivos de arroz. Además, en esta zona hay una gran concentración de vertidos urbanos y algunos industriales relacionados con el comercio de frutas y hortalizas, procesado de legumbres y cereales, granjas avícolas y otros relacionados con la fabricación de vehículos, pinturas y barnices (Figura 1, "Material suplementario").

Así pues, excluyendo el caso de los nitratos, las mayores afecciones se dan sobre todo en la subcuenca de Molinar.

Además, al comparar las Figura 3 y Figura 5, se observa que la mayoría de las masas impactadas coinciden con las de tasas de incumplimientos superiores al 20%. Sin embargo, algunas masas no coincidentes presentan altos porcentajes de afectación (como la 18.15.01.02 en Molinar), lo que puede derivar de medidas adoptadas no incluidas en el modelo o datos deficientes, entre otras razones.

También se observa cómo algunas masas no evaluadas se ven afectadas, como las pertenecientes a las subcuencas de Contreras, Tous y Molinar en el caso de los nitratos, lo que indica que se deberían hacer más muestreos y estudiarlas en profundidad en futuras campañas.

## Simulaciones de cambio climático

En la Figura 6 se representa el número de masas de agua pertenecientes a cada intervalo de incumplimientos por contaminante, simulación y horizonte.

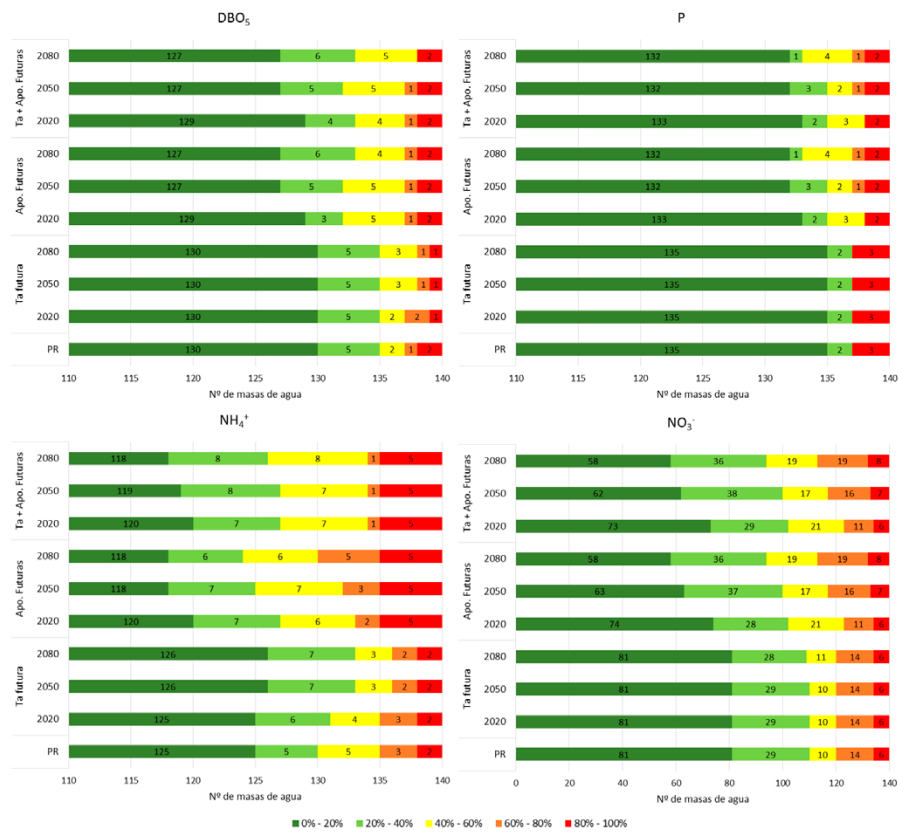

**Figura 6** | Número de masas de agua en cada intervalo de incumplimiento por contaminante (DBO<sub>5</sub>, P, NH<sub>4</sub><sup>+</sup> y NO<sub>3</sub><sup>-</sup>), simulación (periodo de referencia - PR, Ta futura, Apo. Futuras o la combinación de ambas - Ta + Apo. Futuras) y horizonte futuro (2020, 2050 y 2080).

Si nos centramos en la simulación de la Ta futura (Figura 6, parte baja) y se compara con la del periodo de referencia, se observa un comportamiento diferente dependiendo de los contaminantes, mientras que en el caso del P y de los NO<sub>3</sub><sup>-</sup> el número de masas de agua se mantiene en cada intervalo de incumplimientos, en el caso de la DBO<sub>5</sub> y el NH<sub>4</sub><sup>+</sup> algunas de las masas más afectadas sí sufren cambios, principalmente bajando de rango conforme aumenta la Ta en los diferentes horizontes.

Este efecto también se observa en la Figura 7, donde se resaltan las diferencias entre los incumplimientos de los horizontes futuros y los del periodo de referencia en esta simulación (Ta futura) para la DBO<sub>5</sub> y el NH<sub>4</sub><sup>+</sup>. De esta forma se puede apreciar si los incumplimientos se mantienen, disminuyen o aumentan en el futuro.

En el caso de la DBO<sub>5</sub>, se ve como algunas de las masas de Alarcón, Molinar y Sueca han sufrido un pequeño descenso (0--10%) en los incumplimientos del horizonte 2020, donde destaca la masa 18.15.01.02 (Molinar) con una disminución del 15%, que se incrementa a 29% en el 2050 y a 32% en el 2080. Además, las masas 18.12.01.02 y 18.12.01.03 de la misma subcuenca también presentan cambios significativos entre horizontes, alcanzando ambas una disminución de incumplimientos del 13% en el futuro lejano.

En el caso del  $\text{NH}_4^+$ , también se registraron pequeños descensos que se mantienen a lo largo de los horizontes futuros, con la excepción de unas pequeñas masas en la subcuenca de Sueca y la masa 18.15.01.02 de Molinar. Esta última destaca por sus descensos más pronunciados, alcanzando disminuciones del 17% y el 24% en el futuro medio y lejano respectivamente.

Estos resultados indican que la degradación de la  $\text{DBO}_5$  y el  $\text{NH}_4^+$  es muy dependiente de la  $T_a$ , ya que experimentan menores incumplimientos con el aumento de la  $T_a$ , es decir, a más  $T_a$ , más degradación (Serpa *et al.*, 2017).

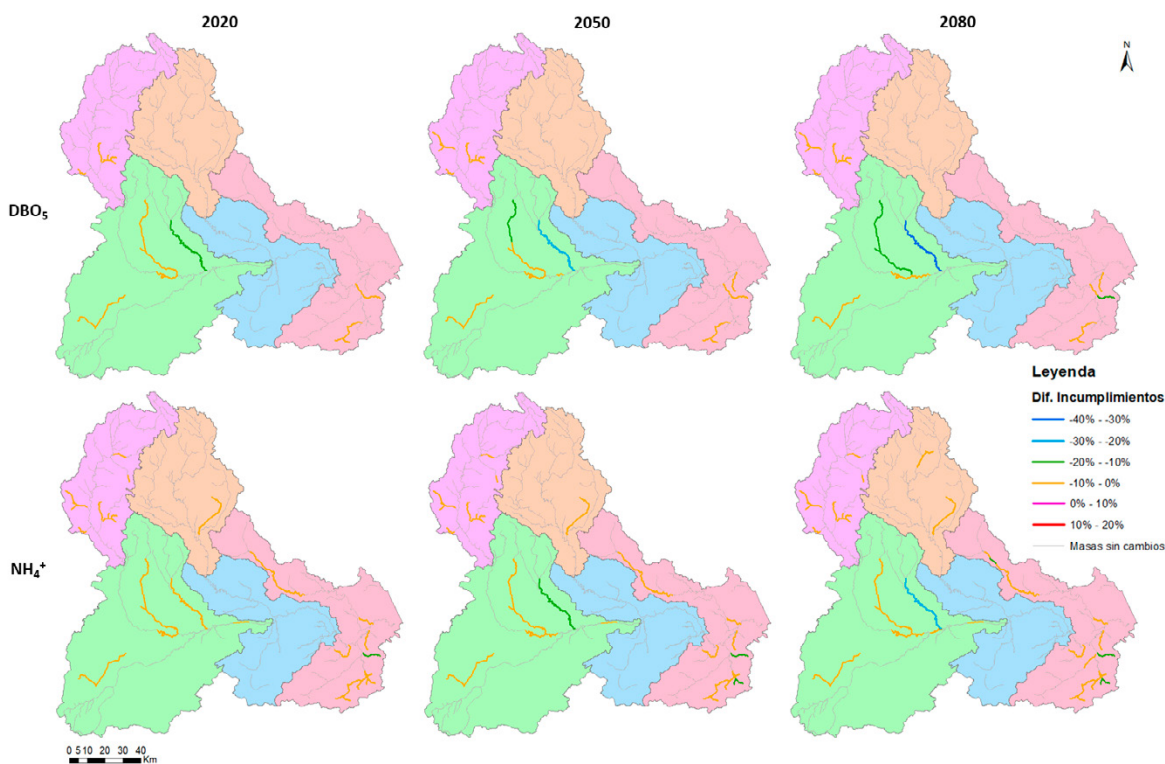

**Figura 7** | Diferencia entre los incumplimientos de los horizontes futuros (2020, 2050 y 2080) y los del periodo de referencia (Figura 5) en la simulación de la  $T_a$  futura para la  $\text{DBO}_5$  y el  $\text{NH}_4^+$ .

Por el contrario, en el caso de los  $\text{NO}_3^-$  (Figura 2, “Material suplementario”) se producen aumentos de los incumplimientos, sobre todo en las masas ya nombradas de Molinar, aunque estos aumentos no son lo suficientemente elevados (<10%) como para pasar de rango de afectación en la Figura 6. Esto se debe a la relación entre el amonio y los nitratos, ya que forman parte de un mismo ciclo. Las tasas de disminución de incumplimientos del amonio observadas al aumentar la  $T_a$  podrían estar relacionadas con los aumentos en los incumplimientos de los nitratos, ya que la rápida degradación del amonio implica el aumento de concentración de nitritos que inmediatamente se convierten en nitratos que permanecen libres para la asimilación de las plantas.

En cambio, las diferencias de las afectaciones estimadas en la simulación de las aportaciones futuras son más notables en el caso de todos los contaminantes (Figura 6, parte media). En términos generales, se estima un mayor número de masas afectadas en los intervalos con mayores incumplimientos al avanzar entre horizontes, sobre todo en el caso del  $\text{NH}_4^+$  y los  $\text{NO}_3^-$ , donde el número de masas con mayores afecciones se incrementa notablemente.

En la Figura 8 se muestran ambos casos, donde hay algunas masas que sufren pequeños descensos en 2020, algo lógico si tenemos en cuenta que las tasas medias de cambio se incrementaban este horizonte en la mayoría de las subcuencas, permitiendo así una mayor dilución de los contaminantes. Sin embargo, también se estiman algunos incrementos preocupantes que se mantienen o incrementan en los horizontes sucesivos. En el caso del  $\text{NH}_4^+$ , destacan las masas de Molinar, sobre todo la 18.15 y la 18.16 con los incrementos más elevados, cerca de un 95% en todos los horizontes. La masa 18.12.01.03 (Molinar) también experimenta un

aumento progresivo hasta llegar a aumentar en un 24% respecto de los incumplimientos del periodo de referencia, junto a otras pequeñas masas de Tous y Sueca posicionadas en el mismo intervalo de cambios (20-40%) en el futuro lejano.

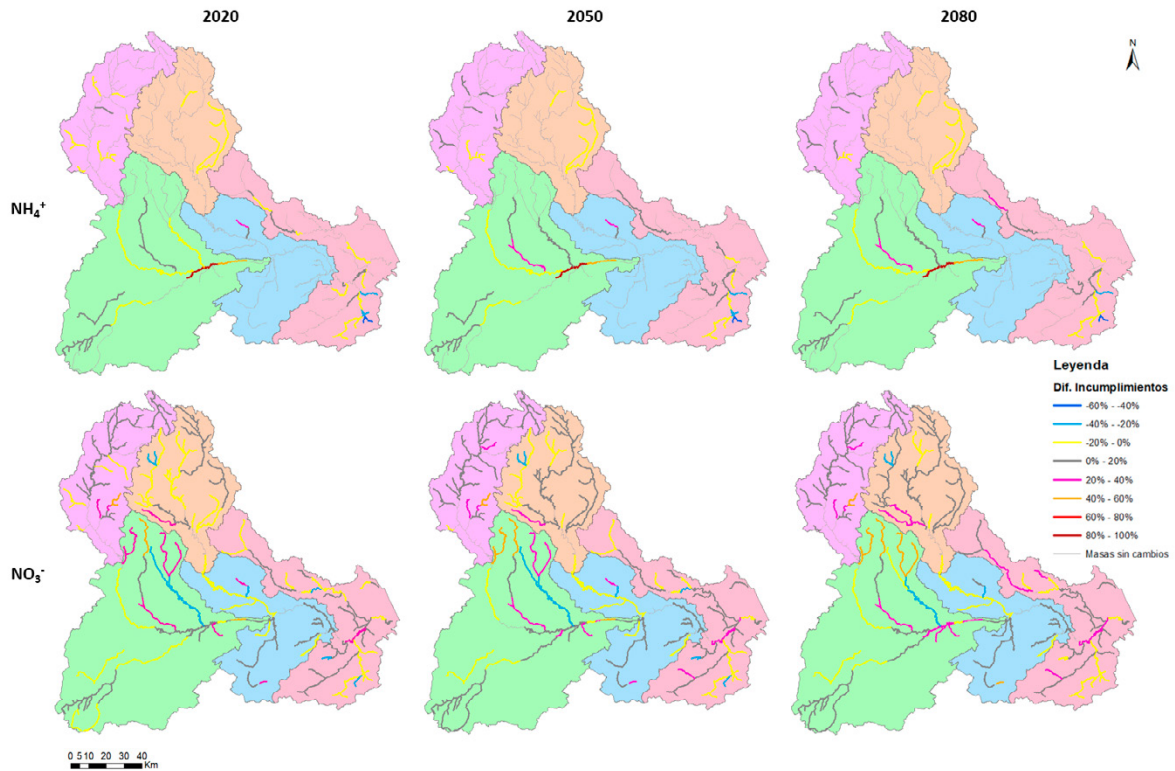

**Figura 8** | Diferencia entre los incumplimientos de los horizontes futuros (2020, 2050 y 2080) y los del periodo de referencia (Figura 5) en la simulación de las aportaciones futuras para el  $\text{NH}_4^+$  y los  $\text{NO}_3^-$ .

En el caso de los  $\text{NO}_3^-$  ocurre algo similar, pero con más masas afectadas por los cambios en todas las subcuencas, aunque la mayoría de ellos son entre el  $|0-20\%|$  en el futuro cercano, estos se van incrementando poco a poco en los sucesivos horizontes. Sin embargo, la mayoría de estos aumentos no son muy elevados ( $<10\%$ ), lo que provoca que la mayoría de masas se queden en los mismos intervalos de incumplimientos. Lo mismo ocurre con la  $\text{DBO}_5$  (Figura 3, “Material suplementario”), donde las diferencias entre los incumplimientos de los horizontes futuros no son muy significativas, ya que las principales masas de agua afectadas (Molinar) permanecen en los mismos intervalos de incumplimientos hasta finales de siglo.

Por último, el caso del P (Figura 3, “Material suplementario”) es similar los anteriores, con algunos descensos de incumplimientos a partir de 2020, probablemente debido al incremento de los recursos en este horizonte, cuyas afectaciones se incrementa ligeramente en los horizontes más lejanos (Figura 6). La cuenca más afectada sigue siendo Molinar.

Cuando se estima el efecto combinado de ambas variables (Figura 6, parte alta), solo se experimentan cambios evidentes en los resultados de la  $\text{DBO}_5$  y el  $\text{NH}_4^+$ , ya que la degradación de los otros contaminantes (Figura 4, “Material suplementario”) parecen no estar influenciados por la  $T_a$  y por lo tanto sus resultados no difieren de los de la simulación anterior (aportaciones futuras).

En la Figura 9 se observa como las mayores diferencias siguen presentándose en la subcuenca de Molinar para ambos contaminantes de esta simulación combinada, donde el efecto de la  $T_a$  (disminuciones Figura 7) frena el incremento de incumplimientos procedente de la disminución de recursos (Figura 8), sobre todo en el caso del  $\text{NH}_4^+$  (Figura 6).

En el caso de la  $\text{DBO}_5$ , la mayoría de masas siguen en los mismos intervalos de afectación durante todos los horizontes, aunque las masas 18.15.01.02 y 18.12.01.03 de Molinar llaman la atención por los enormes descensos experimentados, probablemente provocados por el aumento de  $T_a$  y la mayor aportación de recursos en el horizonte 2020. Por otro lado, las masas 18.15 y 18.16 de

la misma subcuenca se encuentran altamente afectadas (80-100%). Estas masas con una afectación inaceptable también destacan en el caso del  $\text{NH}_4^+$ , junto a pequeños aumentos de incumplimientos graduales hasta finales de siglo en las subcuencas de Alarcón y Sueca. En cambio, también se observan mayores descensos a futuro de la masa 18.15.01.02 (Molinar) por la gran influencia ejercida por la Ta, a pesar de los incrementos observados en la Figura 8.

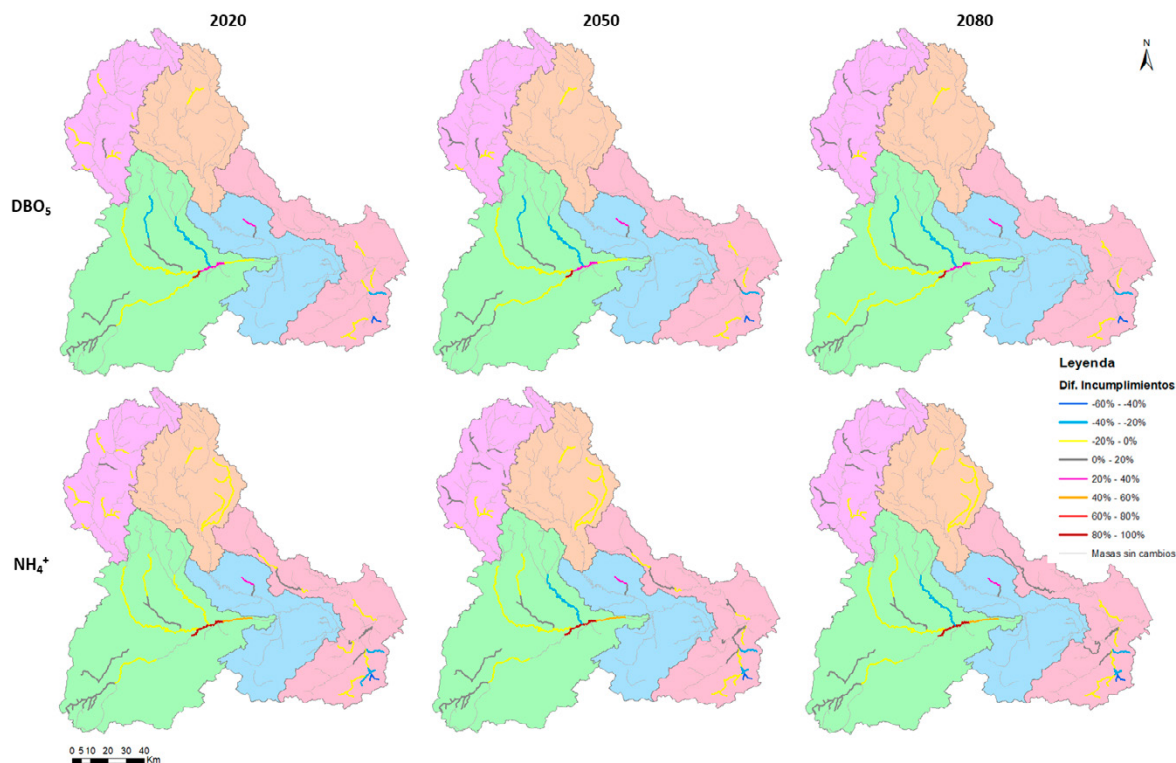

**Figura 9** | Diferencia entre los incumplimientos de los horizontes futuros (2020, 2050 y 2080) y los del periodo de referencia (Figura 5) en la simulación de la Ta y las aportaciones futuras para la  $\text{DBO}_5$  y el  $\text{NH}_4^+$ .

Todos estos resultados se podrían resumir en una relación directa entre la reducción futura de los recursos disponibles y mayores afectaciones de las masas de agua de la cuenca del Júcar, presentando mayor número de masas afectadas en mayores intervalos de incumplimientos de contaminantes entre los horizontes 2050 y 2080. Esta relación se debe principalmente a la menor capacidad de dilución que presentan las masas de agua al reducirse sus aportaciones (Serpa *et al.*, 2017; Rocha *et al.*, 2020), que se ve amortiguada por la mayor degradación experimentada por algunos contaminantes al aumentar la Ta, pudiendo obtener menores niveles de afectación en algunas de las masas más afectadas debido a su efecto combinado.

Por este motivo, se hace necesaria la inclusión de la Ta en la simulación de la  $\text{DBO}_5$  y el  $\text{NH}_4^+$  siempre que sea posible, ya que su degradación depende en gran medida de estos valores y su consideración podría marcar la diferencia a la hora de detectar futuros problemas de calidad de agua en masas no evaluadas.

Sin embargo, hay que tener en cuenta que en este estudio se han utilizado aportaciones producto de la aplicación de tasas medias de cambio a un periodo histórico, y aunque han sido obtenidas por medio de proyecciones climáticas, estos datos tienen mucha incertidumbre asociada, que además va aumentando en la cadena de modelos (Suárez-Almiñana, *et al.*, 2020b). También, hemos utilizado un modelo simplificado en el que los porcentajes de incumplimientos corresponden a los promedios de la serie histórica y de los horizontes futuros, que quizás estén condicionadas por los periodos de sequía y los meses de verano, en los que algunos cauces carecen de agua.

Entre esta incertidumbre también hay que considerar que se ha simulado con las características actuales del sistema, no considerando otros posibles cambios a futuro. En este sentido, la simulación se podría mejorar considerando otras variables

como: escenarios socioeconómicos relacionados con la demanda futura (Shared Socioeconomic Pathways – SSP) (Jin *et al.*, 2018; Hunink *et al.*, 2019), ya que esto afecta a la carga de contaminante; tasas de reducción de la demanda agrícola relacionadas con la modernización de los cultivos (Hunink *et al.*, 2019); cambios en los usos del suelo (Serpa *et al.*, 2017; Shrestha *et al.*, 2018); los caudales ecológicos o mayores restricciones ambientales, entre otros. Aunque estos aportes también podrían ser fuentes potenciales de incertidumbre.

Por último, decir que este estudio se puede considerar como una señal de alerta ante lo que podría ocurrir en el futuro de la cuenca del Júcar si no se toman medidas de adaptación al cambio climático, ya que debido a sus efectos sobre los recursos hídricos y la Ta podría haber graves problemas de contaminación en los ríos de esta cuenca, afectando a la gestión eficaz de los recursos hídricos y acarreado graves problemas ambientales y socio-económicos.

---

## CONCLUSIONES

Mediante la estimación de la Ta y aportaciones futuras por medio de tasas medias de cambio y su integración en el modelo de calidad del agua RREA para la cuenca del Júcar, se ha demostrado que las masas de agua afectadas en la actualidad podrían experimentar afecciones más graves en el futuro debido al cambio climático. En general, Molinar es la subcuenca que podría verse más afectada en el futuro por todos los contaminantes estudiados, junto con la subcuenca de Sueca en el caso de los nitratos, al estar sometida a una mayor actividad agrícola. Además, las afecciones más drásticas se dan en los horizontes 2050 y 2080, donde el número de masas afectadas en rangos de porcentajes de incumplimientos elevados (60-100%) es preocupante.

Por otro lado, en este estudio también se ha estimado la influencia de la Ta en la degradación de algunos contaminantes ( $\text{DBO}_5$  y  $\text{NH}_4^+$ ), por lo que se aconseja integrar esta variable en este tipo de simulaciones siempre que sea posible, evitando así subestimar o sobrestimar afecciones.

Con esta herramienta se da una visión global del estado futuro de la cuenca, considerando las limitaciones que se adquieren al emplear un modelo simplificado y la incertidumbre propia de las proyecciones climáticas. En este sentido, aparte de analizar los incrementos en los incumplimientos de los contaminantes, también se han detectado las zonas más afectadas y algunas masas de agua no analizadas que aparecen afectadas, por lo que este método puede servir de apoyo en el proceso de toma de decisiones a la hora de localizar los principales focos de contaminación, proponer actuaciones a pequeña escala e intentar solucionarlos a largo plazo para no poner en riesgo el suministro, con todos los problemas ambientales y socio-económicos que esto podría acarrear.

---

## AGRADECIMIENTOS

Los autores agradecen al Ministerio de Ciencia e Innovación (MICINN) por financiar el proyecto RESPHIRA (PID2019-106322RB-100) y a la Agencia Estatal de Investigación (MINECO) por financiar el proyecto ERAS (CTM2016-77804-P), cofinanciado con Fondos FEDER. Además, también valoramos el apoyo de la Comunidad Europea en la financiación de los proyectos IMPREX (H2020-WATER-2014–2015, 641811) y SWICCA (ECMRWF-Copernicus-FA 2015/ C3S\_441-LOT1/SMHI). Por último, agradecer al Programa de Apoyo para la Investigación y Desarrollo (PAID-01-17) de la Universitat Politècnica de València por fomentar y facilitar los contratos de formación de personal investigador.

---

## REFERENCIAS

Ahmad, J.I., Dignum, M., Liu, G., Medema, G., van der Hoek, J.P. 2021. Changes in biofilm composition and microbial water quality in drinking water distribution systems by temperature increase induced through thermal energy recovery. *Environmental Research*, 194, 110648. <https://doi.org/10.1016/j.envres.2020.110648>

- Arnold, J.G., Srinivasan, R., Muttiah, R.S., Williams, J.R. 1998. Large area hydrologic modeling and assessment Part I: Model development. *Journal of the American Water Resources Association*, 34, 73-89. <https://doi.org/10.1111/j.1752-1688.1998.tb05961.x>
- Barranco, L., Dimas, M., Jiménez, A., Estrada, F. 2018. Nueva evaluación del impacto futuro del cambio climático en los recursos hídricos en España. *Ingeniería Civil*, 191, 34-55.
- BOE. 2015. *Real Decreto 817/2015, de 11 de septiembre, por el que se establecen los criterios de seguimiento y evaluación del estado de las aguas superficiales y las normas de calidad ambiental, Actualidad Jurídica Ambiental*.
- Bowie, G.L., Mills, W.B., Porcella, D.B., Campbell, C.L., Pagenkopf, J.R., Rupp, G.L., Johnson, K.M., Chan, P.W.H., Gherini, S.A., Chamberlin, C.E. 1985. *Rates, Constants, and Kinetics Formulations in Surface Water Quality Modeling*. EPA/600/3-. Athens, Georgia: U.S. Environmental Protection Agency.
- CEDEX. 2017. *Evaluación Del Impacto Del Cambio Climático En Los Recursos Hídricos y Sequías de España*. Informe técnico para el Ministerio de Agricultura y Pesca, Alimentación y Medio Ambiente. Madrid, España.
- CHJ. 2015. *Plan Hidrológico de la Demarcación Hidrográfica del Júcar. Memoria ciclo de planificación hidrológica 2015-2021*. Ministerio de Agricultura, Alimentación y Medio Ambiente. Valencia, España.
- European Parliament. 2000. *Directive 2000/60/EC of the European Parliament and of the Council of 23 October 2000 Establishing a Framework for Community Action in the Field of Water Policy*. Brussels: Official Journal.
- Ferrer, J., Seco, A. 2008. *Tratamientos Biológicos de Aguas Residuales*. Valencia, España: Universidad Politécnica de Valencia: Alfaomega Grupo Editor.
- Flynn, K.F., Suplee, M.W., Chapra, S.C., Tao, H. 2015. Model-Based Nitrogen and Phosphorus (Nutrient) Criteria for Large Temperate Rivers: 1. Model Development and Application. *Journal of the American Water Resources Association*, 51(2), 421-446. <https://doi.org/10.1111/jawr.12253>.
- Gutiérrez, B., de Jalón, D.G., 1999. Modelización térmica de los ríos Cea y Manzanares. *Limnetica*, 17, 1-12.
- Hunink, J., Simons, G., Suárez-Almiñana, S., Solera, A., Andreu, J., Giuliani, M., Zamberletti, P., Grillakis, M., Koutroulis, A., Tsanis, I., Schasfoort, F., Contreras, S., Ercin, E., Bastiaanssen, W. 2019. A Simplified Water Accounting Procedure to Assess Climate Change Impact on Water Resources for Agriculture across Different European River Basins. *Water*, 11, 1976. <https://doi.org/10.3390/w11101976>
- IPCC, 2014. *Climate Change 2014: Synthesis Report. Contribution of Working Groups I, II and III to the Fifth Assessment Report of the Intergovernmental Panel on Climate Change* [Core Writing Team, R.K. Pachauri and L.A. Meyer (eds.)]. IPCC, Geneva, Switzerland, 151 pp. <https://doi.org/10.1017/CBO9781107415324>
- Jin, L., Whitehead, P.G., Rodda, H., Macadam, I., Sarkar, S. 2018. Simulating climate change and socio-economic change impacts on flows and water quality in the Mahanadi River system, India. *Science of the Total Environment*, 637-638, 907-17. <https://doi.org/10.1016/j.scitotenv.2018.04.349>
- Jong-Suk, K., Shaleen, J., Joo-Heon, L., Hua, C., Seo-Yeon, P. 2019. Quantitative vulnerability assessment of water quality to extreme drought in a changing climate. *Ecological Indicators*, 103(March), 688-97. <https://doi.org/10.1016/j.ecolind.2019.04.052>
- Lemos, M.C., Rood, R.B. 2010. Climate Projections and Their Impact on Policy and Practice. *Wiley Interdisciplinary Reviews: Climate Change*, 1(5), 670-82. <https://doi.org/10.1002/wcc.71>
- Marcos-Garcia, P., Pulido-Velazquez, M. 2017. Cambio Climático y Planificación Hidrológica: ¿es adecuado asumir un porcentaje único de reducción de aportaciones para toda la demarcación? *Ingeniería del Agua*, 21(1), 35. <https://doi.org/10.4995/ia.2017.6361>
- Naustdalslid, J. 2011. Climate change - The challenge of translating scientific knowledge into action. *International Journal of Sustainable Development and World Ecology*, 18(3), 243-52. <https://doi.org/10.1080/13504509.2011.572303>



- Paredes-Arquiola, J. 2021. *Manual Técnico Del Modelo Respuesta Rápida Del Estado Ambiental (RREA) de Masas de Agua Superficiales Continentales*. Universitat Politècnica de València. Valencia, España. [https://aquatool.webs.upv.es/files/manuales/rrea/ManualT%C3%A9cnicoModeloRREA\\_V3.pdf](https://aquatool.webs.upv.es/files/manuales/rrea/ManualT%C3%A9cnicoModeloRREA_V3.pdf)
- Pellicer-Martínez, F., Martínez-Paz, J.M. 2016. The Water Footprint as an Indicator of Environmental Sustainability in Water Use at the River Basin Level. *Science of the Total Environment*, 571, 561-74. <https://doi.org/10.1016/j.scitotenv.2016.07.022>
- Pérez-Martín, M. 2005. *Modelo distribuido de simulación del ciclo hidrológico con calidad de aguas integrado en sistemas de información geográfica para grandes cuencas. Aportación al análisis de presiones e impactos de la Directiva Marco Europea del Agua*. Universidad Politécnica de Valencia. Valencia, España.
- Rocha, J., Carvalho-Santos, C., Diogo, P., Beça, P., Keizer, J.J., Nunes, J.P., 2020. Impacts of climate change on reservoir water availability, quality and irrigation needs in a water scarce Mediterranean region (southern Portugal). *Science of the Total Environment* 736. <https://doi.org/10.1016/j.scitotenv.2020.139477>
- Serpa, D., Nunes, J.P., Keizer, J.J., Abrantes, N. 2017. Impacts of climate and land use changes on the water quality of a small Mediterranean catchment with intensive viticulture. *Environmental Pollution*, 224, 454-65. <https://doi.org/10.1016/j.envpol.2017.02.026>
- Shrestha, S., Bhatta, B., Shrestha, M., Shrestha, P.K. 2018. Integrated assessment of the climate and landuse change impact on hydrology and water quality in the Songkhram River Basin, Thailand. *Science of the Total Environment*, 643, 1610-22. <https://doi.org/10.1016/j.scitotenv.2018.06.306>
- Suárez-Almiñana, S., Pedro-Monzonis, M., Paredes-Arquiola, J., Andreu, J., Solera, A. 2017. Linking Pan-European data to the local scale for decision making for global change and water scarcity within water resources planning and management. *Science of the Total Environment*, 603-604, 126-39. <https://doi.org/10.1016/j.scitotenv.2017.05.259>
- Suárez-Almiñana, S., Solera, A., Andreu, J., García-Romero, L. 2020a. Análisis de incertidumbre de las proyecciones climáticas en relación a las aportaciones históricas en la Cuenca del Júcar. *Ingeniería del Agua*, 24(2), 1-12. <https://doi.org/10.4995/ia.2020.12149>
- Suárez-Almiñana, S., Solera, A., Madrigal, J., Andreu, J., Paredes-arquiola, J. 2020b. Risk assessment in water resources planning under climate change at the Júcar River Basin. *Hydrology and Earth System Science*, 24(11), 5297-5315. <https://doi.org/10.5194/hess-24-5297-2020>
- Témez, J.R. 1977. Modelo matemático de transformación precipitación-aportación. *ASINEL*.
- Trewin, B.C. 2007. Función de las normales climatológicas en un clima cambiante. Edited by O. Baddour and H. Kontongomde. *Organización Meteorológica Mundial*. Vol. 43. Ginebra.
- Wang, Y., Zhang, N., Wang, D., Wu, J. 2020. Impacts of cascade reservoirs on Yangtze River water temperature: Assessment and ecological implications. *Journal of Hydrology*, 590, 125240. <http://doi.org/10.1016/j.jhydrol.2020.125240>
- Whitehead, P.G., Wilson, E.J., Butterfield, D., Seed, K. 1998. A semi-distributed integrated flow and nitrogen model for multiple source assessment in catchments (INCA): part II - application to large river basins in south Wales and eastern England. *Science of the Total Environment*, 210, 559-583. [https://doi.org/10.1016/S0048-9697\(98\)00038-2](https://doi.org/10.1016/S0048-9697(98)00038-2)
- Xu, L., Li, H., Liang, X., Yao, Y., Zhou, L., Cui, X. 2012. Water quality parameters response to temperature change in small shallow lakes. *Physics and Chemistry of the Earth*, 47-48, 128-134. <https://doi.org/10.1016/j.pce.2010.11.005>
- Zlatanović, L., van der Hoek, J.P., Vreeburg, J.H.G. 2017. An experimental study on the influence of water stagnation and temperature change on water quality in a full-scale domestic drinking water system. *Water Research*, 123, 761-772. <https://doi.org/10.1016/j.watres.2017.07.019>

## MATERIAL SUPLEMENTARIO

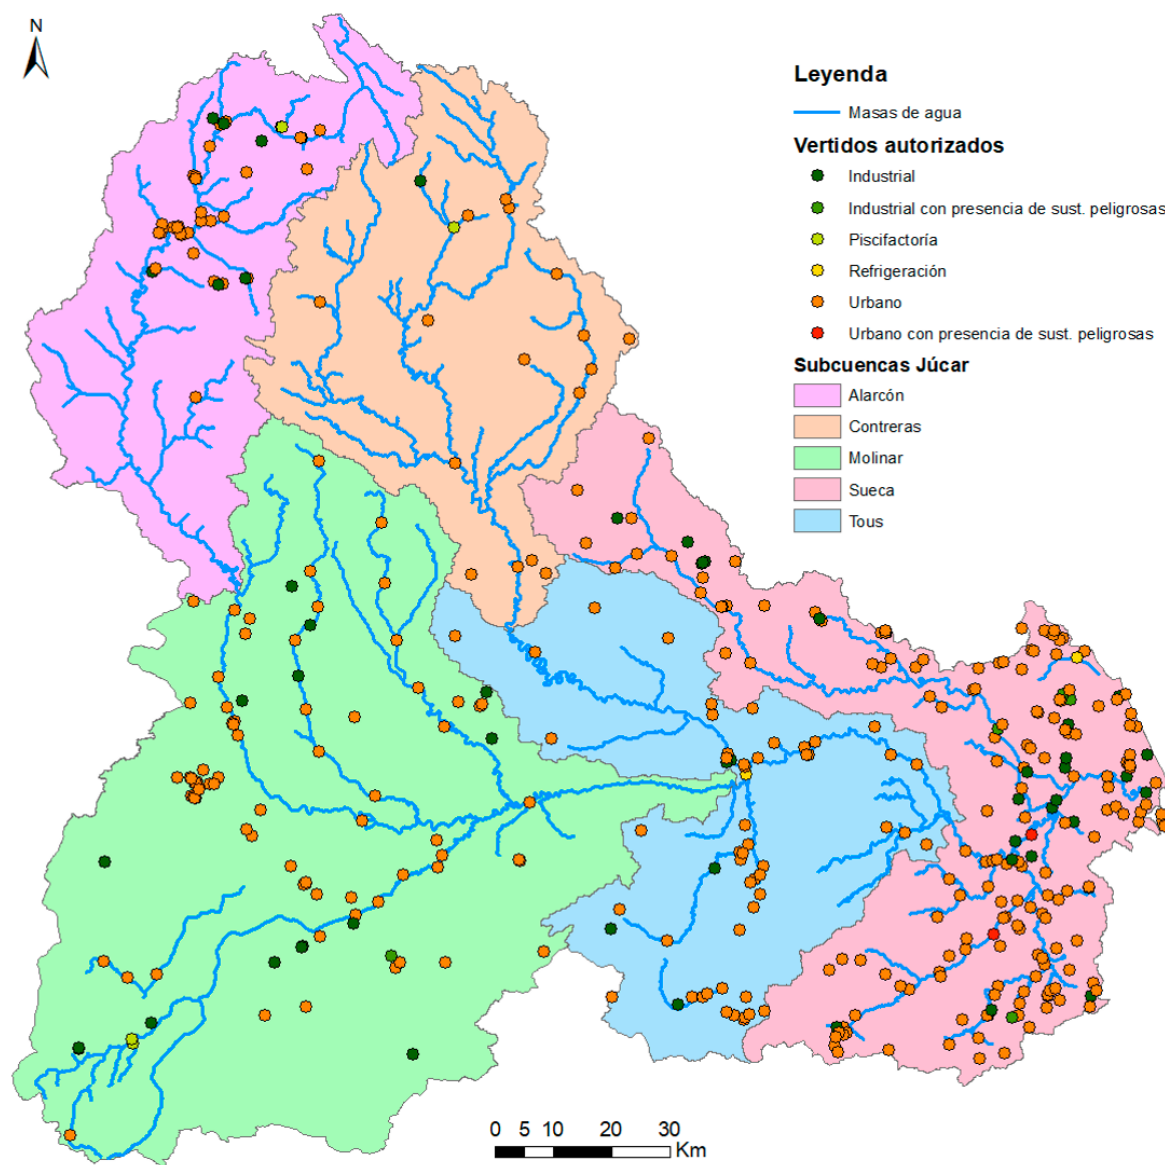

Figura 1 | Naturaleza de los vertidos autorizados en la cuenca del Júcar. Fuente: Censo de vertidos autorizados de la DHJ (CHJ, 2015).

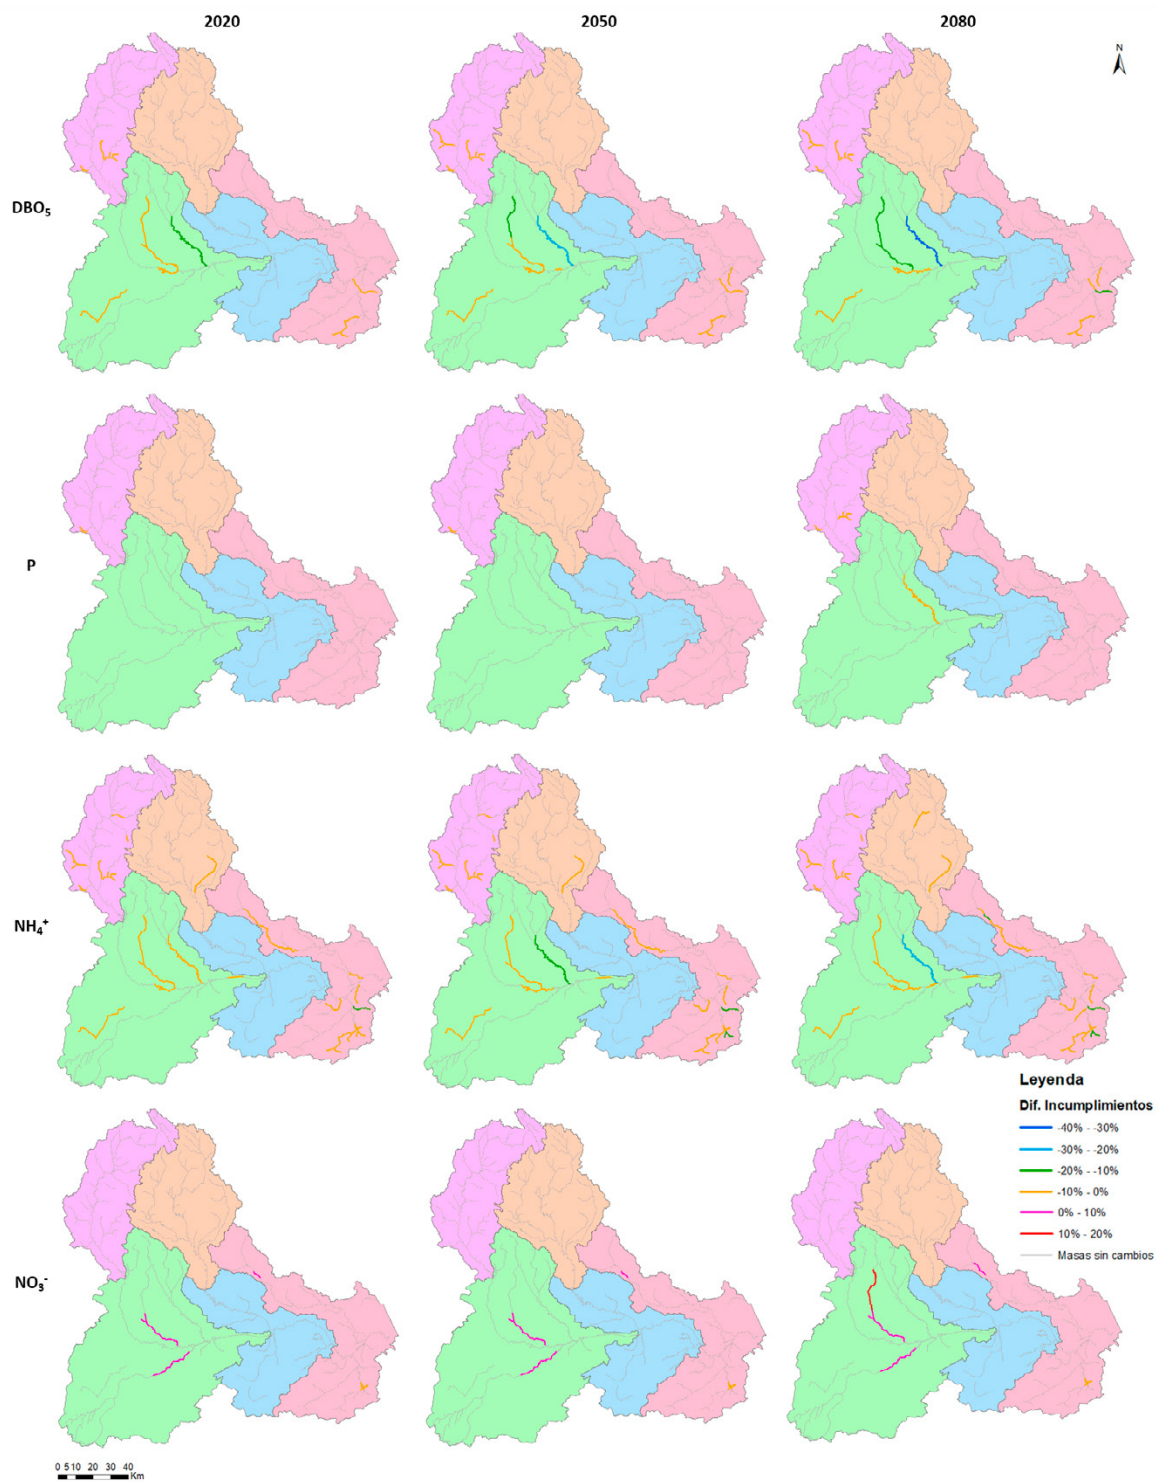

**Figura 2** | Diferencia entre los incumplimientos de los horizontes futuros (2020, 2050 y 2080) y los del periodo de referencia en la simulación de la Ta futura para cada contaminante (DBO<sub>5</sub>, P, NH<sub>4</sub><sup>+</sup> y NO<sub>3</sub><sup>-</sup>).

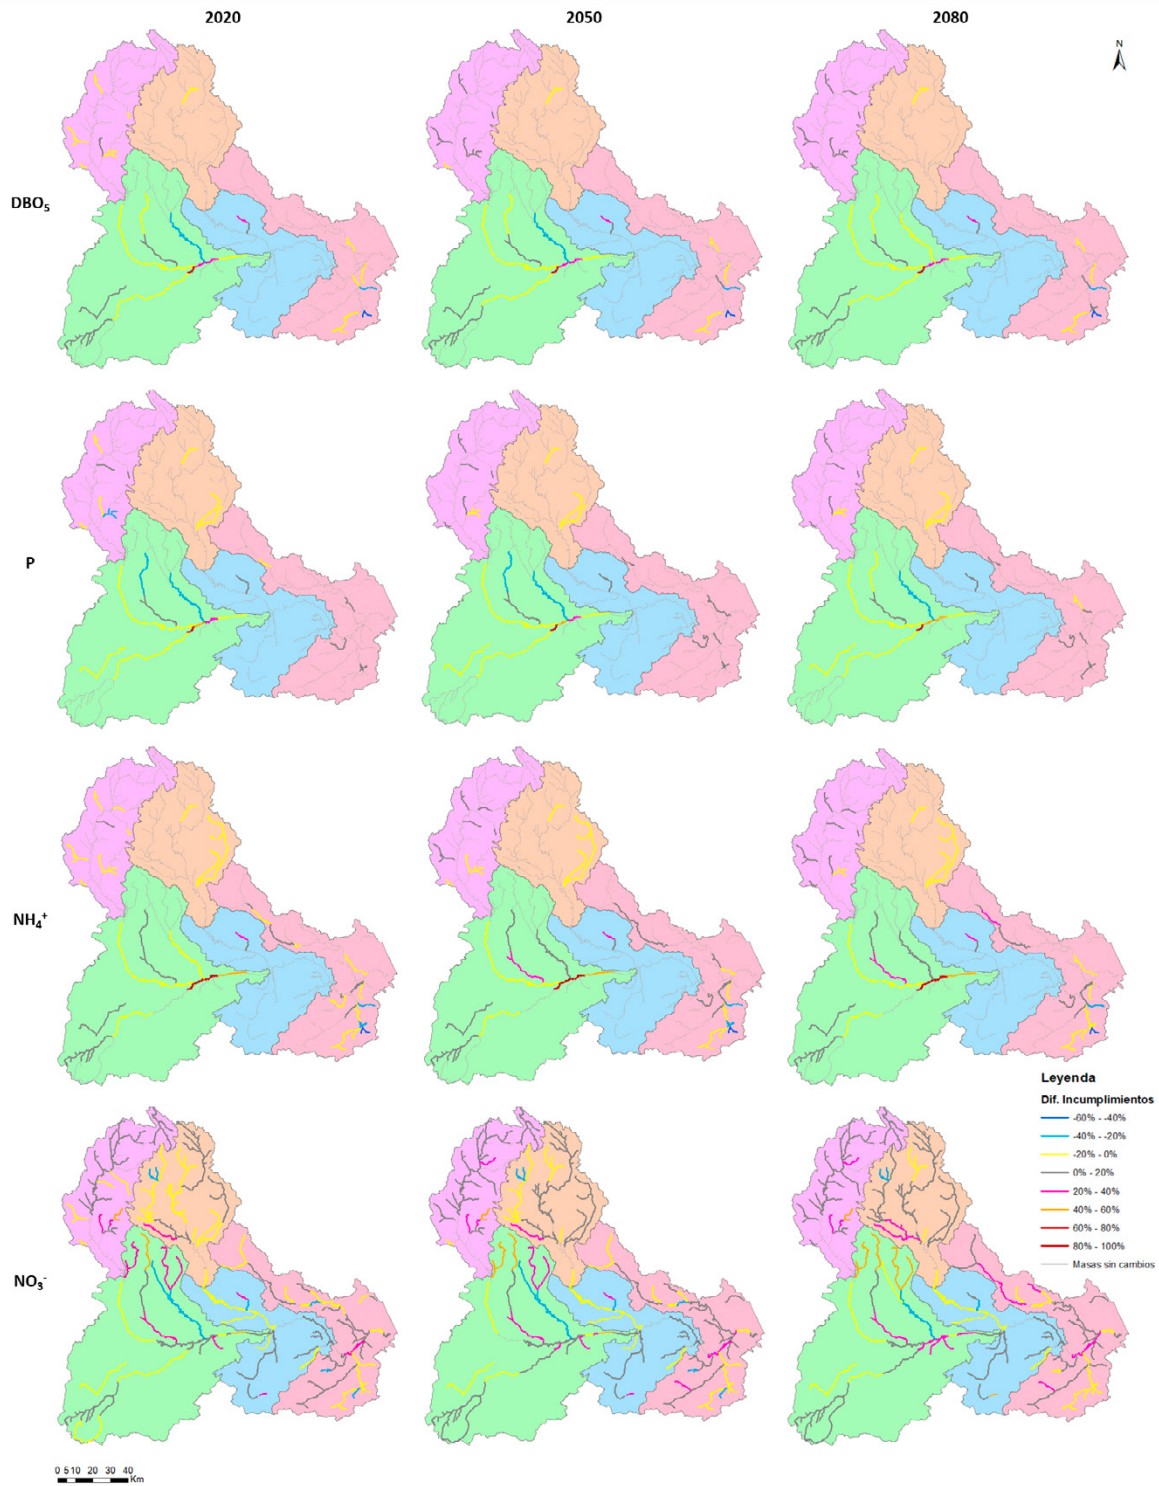

**Figura 3** | Diferencia entre los incumplimientos de los horizontes futuros (2020, 2050 y 2080) y los del periodo de referencia en la simulación de las aportaciones futuras para cada contaminante (DBO<sub>5</sub>, P, NH<sub>4</sub><sup>+</sup> y NO<sub>3</sub><sup>-</sup>).

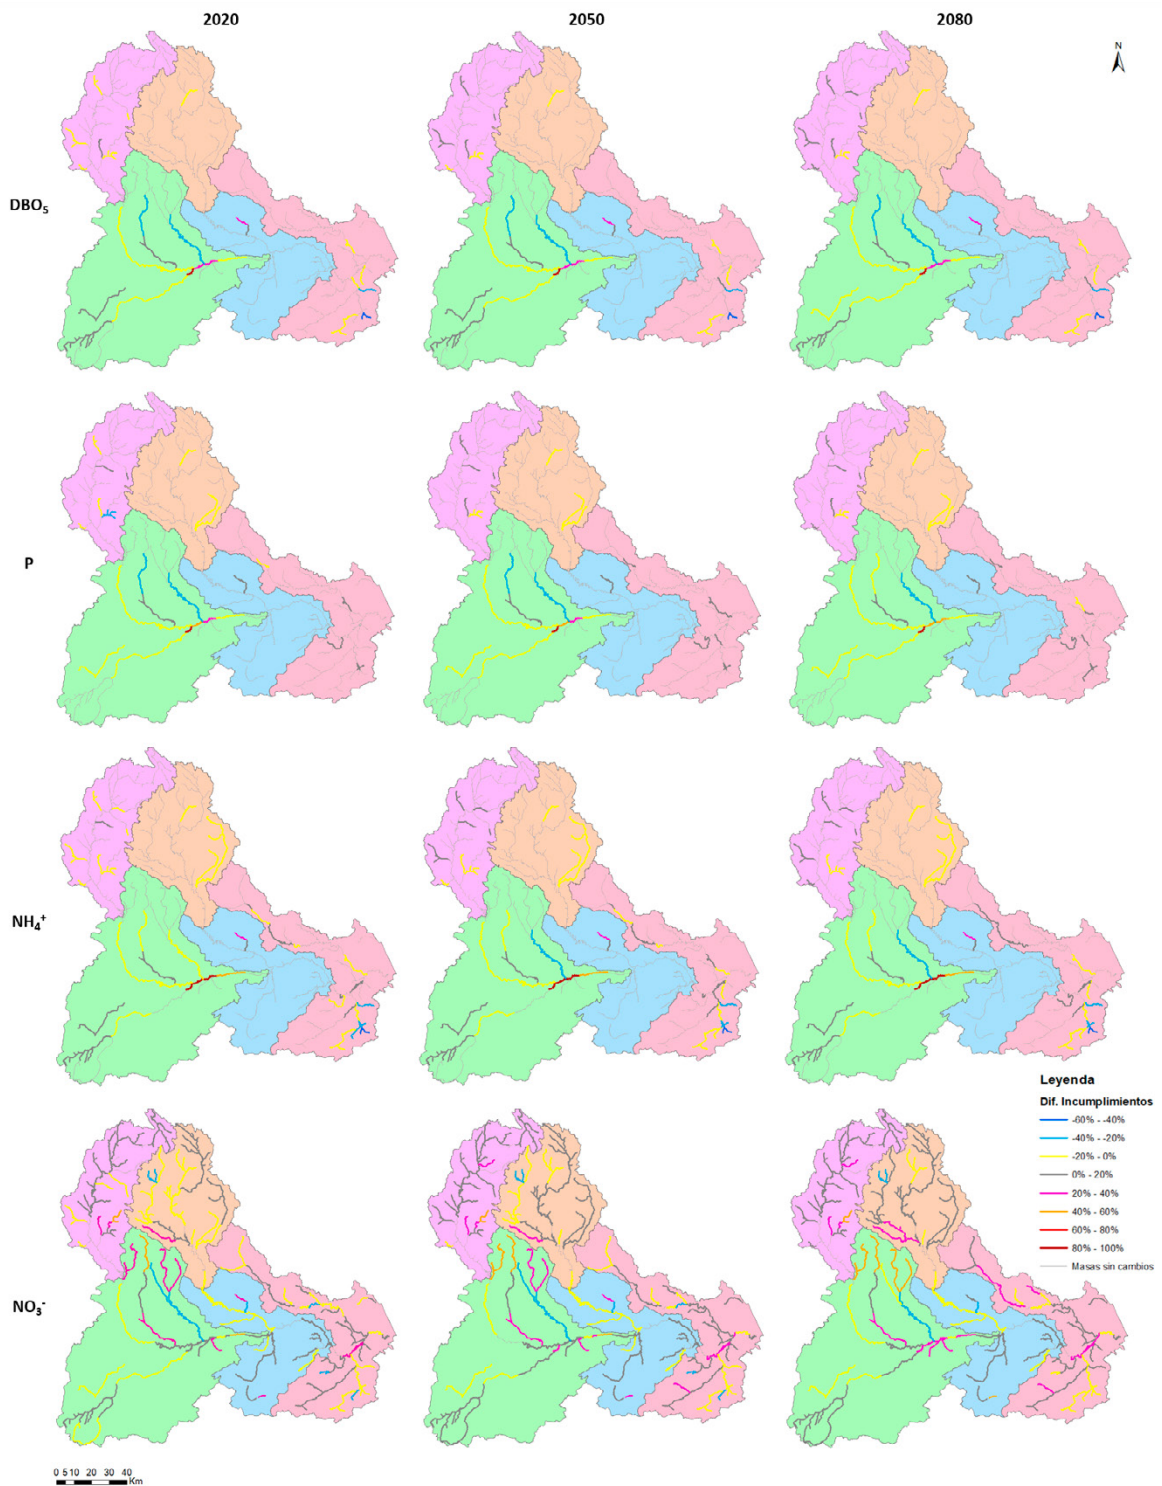

**Figura 4 |** Diferencia entre los incumplimientos de los horizontes futuros (2020, 2050 y 2080) y los del periodo de referencia en la simulación de la Ta y las aportaciones futuras para cada contaminante (DBO<sub>5</sub>, P, NH<sub>4</sub><sup>+</sup> y NO<sub>3</sub><sup>-</sup>).
